# Supplementary material for: Hyperactivated PTP1B phosphatase in parvalbumin neurons alters anterior cingulate inhibitory circuits and induces autism-like behaviors
Source: PubMed Central journal article supplement (PMC7039907; doi:10.1038/s41467-020-14813-z), 2020-02-24
Supplement: 41467_2020_14813_MOESM1_ESM.pdf [file 41467_2020_14813_MOESM1_ESM.pdf]

**Unleashed tyrosine phosphatase PTP1B activity in parvalbumin neurons  
alters homeostasis of anterior cingulate inhibitory circuits  
and induces autism-like behaviors in mice**

Li Zhang et al.

Supplementary information

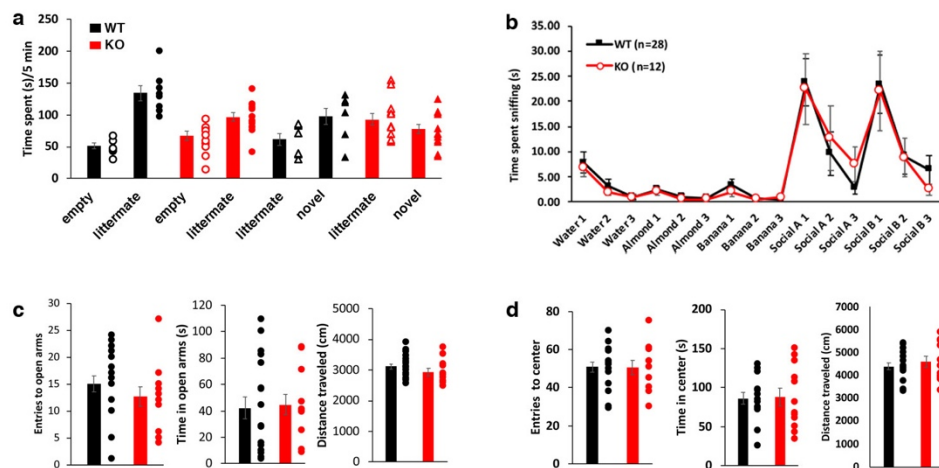

**Supplementary Figure 1** Behavior tests of PV-*Lmo4*KO mice. **(a)** Time spent in social interaction and novelty tests, used for discrimination index in Figure 1. n=8 WT, 14 KO. **(b)** Olfactory response measured as time spent sniffing non-social and social odors. n=28 WT, 12 KO. **(c)** Elevated plus maze test. **(d)** Open field test. n=18 WT, 12 KO (c, d). All data are presented as means  $\pm$  SEM.

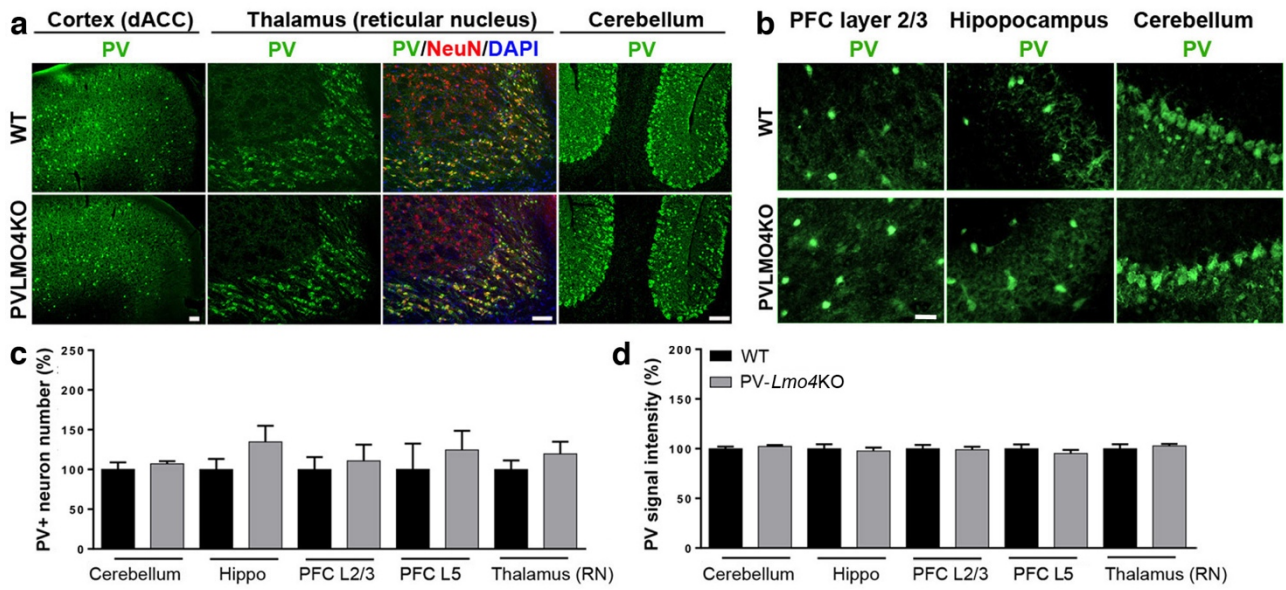

**Supplementary Figure 2** No loss of PV neurons or PV expression in PV-*Lmo4*KO mice. PV-*Lmo4*KO mice show similar PV+ immunostaining (**a**, **b**) in numbers (**c**) and density (**d**) as littermate control WT mice. Scale bar, 100  $\mu$ m (**a**) and 35  $\mu$ m (**b**). n=4 mice per genotype. All data are presented as means  $\pm$  SEM.

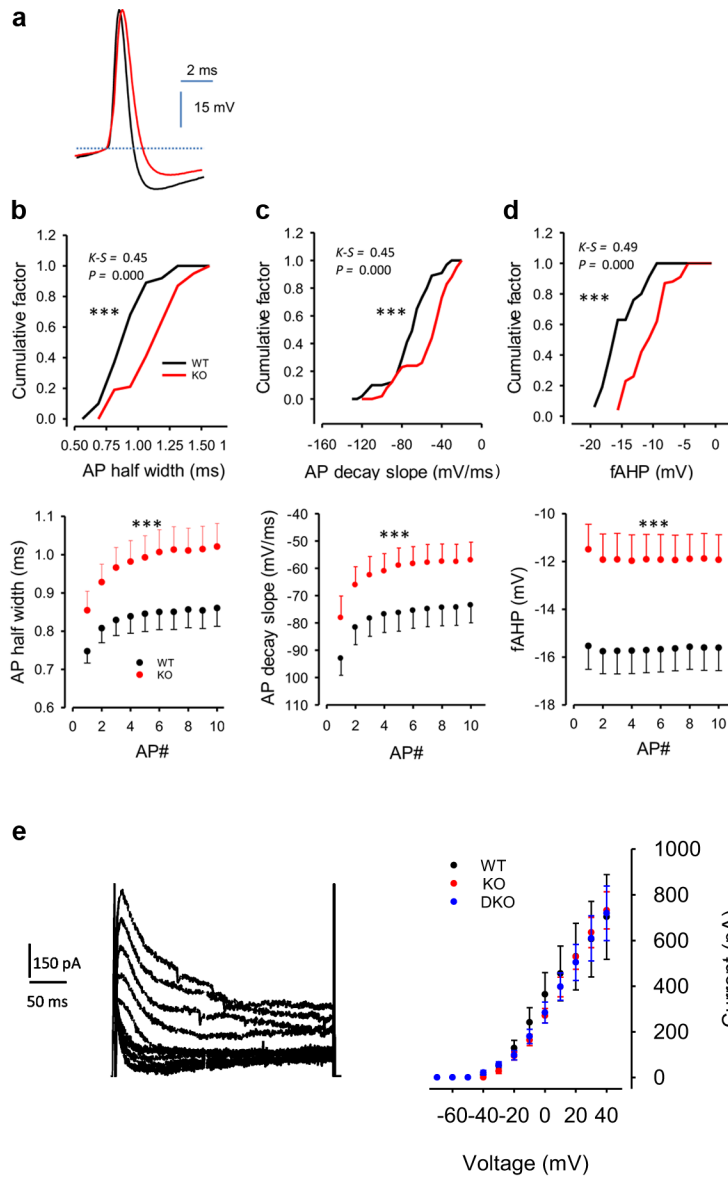

**Supplementary Figure 3** PV interneuron properties are altered in PV-*Lmo4*KO mice. **(a)** Representative action potential (AP) traces of WT (black) and KO (red). Distribution of the parameters (AP half width **(b)**, AP decay slope **(c)**, fAHP **(d)**) from all AP (top panels) or the first ten AP (bottom panels) were analyzed. PV-*Lmo4*KO showed increased width of AP **(b)**, decreased decay of AP **(c)** and reduced fast afterhyperpolarization (fAHP). n=11 cells/5 WT, 13 cells/5 KO mice. \*\*\*, p<0.0001. **(e)** No difference in the  $I_A$  currents. 19 cells/4 WT, 12 cells/3 KO, 11 cells/3 DKO (PV-*Cre/Lmo4<sup>flox/flox</sup>PTP1B<sup>flox/flox</sup>*) mice. All data are presented as means  $\pm$  SEM.

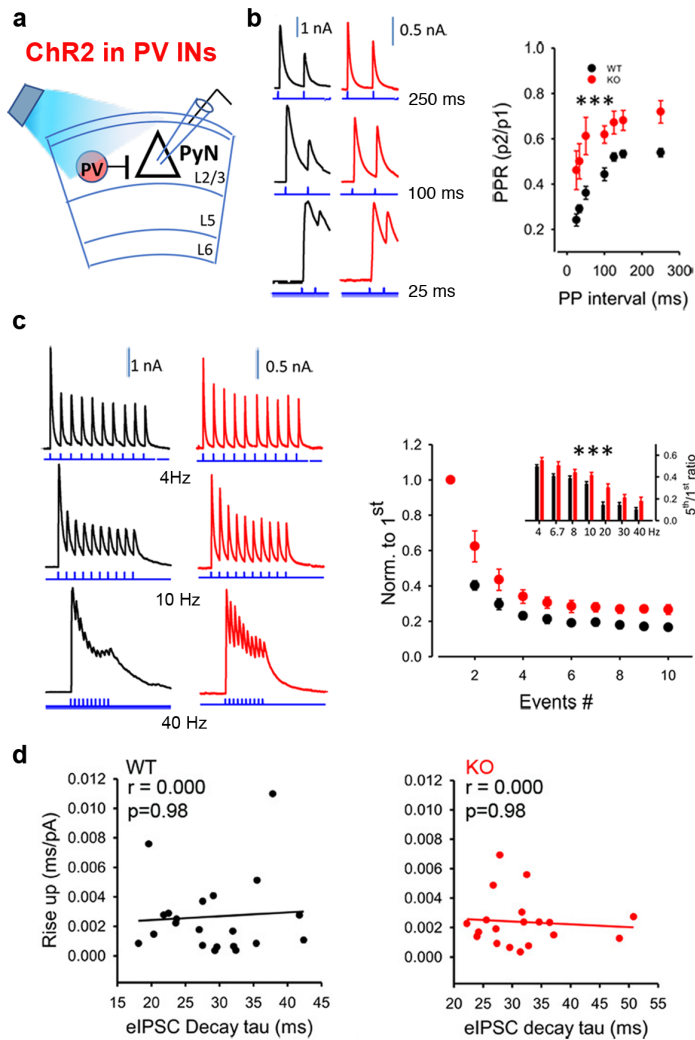

**Supplementary Figure 4** Direct photo-activation of PV interneurons shows an increase in paired-pulse ratio (PPR) but decreased short-term depression of IPSC in PV-*Lmo4*KO mice. **(a)** AAV9 vectors expressing cre-dependent ChR2 were stereotactically injected to the dACC of PV-Cre/*Lmo4*KO<sup>WT/WT</sup> (WT) or PV-Cre/*Lmo4*<sup>flox/flox</sup> (PV-*Lmo4*KO) mice. The inhibitory synaptic responses at the L2/3 pyramidal neurons (PyN) after photoactivation of PV interneurons (PV INs) showed an increase in **(b)** PPR. The sample traces of WT (black) and PV-*Lmo4*KO (red) at various pulse durations were shown at the left. **(c)** Short-term depression of IPSC was also reduced in KO, as shown at 20 Hz. Left are sample traces at different frequencies. Inset, the mean of 5<sup>th</sup>/1<sup>st</sup> ratio of inhibitory synaptic responses were compared at various stimulation frequencies.  $n = 11$  cells from 6 WT, 14 cells from 5 KO mice for **b** & **c**. **(d)** No correlation of IPSC decay time and rise slope further confirms these inhibitory inputs occur at the somata of L2/3 pyramidal neurons, consistent with where PV interneurons synapse.  $n = 22$  cells/7 WT, 19 cells/7 KO mice. \*\*\*,  $p < 0.0001$ .

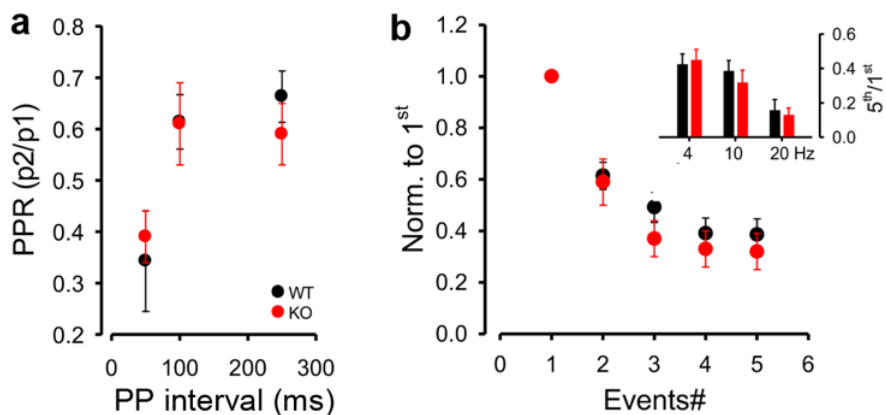

**Supplementary Figure 5** No change in excitatory synaptic response at the dACC layer 2/3 pyramidal neurons of PV-*Lmo4*KO mice after photo-activation of MD thalamocortical projections. **(a)** Paired-pulse ratio of EPSC at various pulse durations. **(b)** Short term depression of EPSC after repetitive stimulation at 10 Hz, inset is the mean of the ratio of 5<sup>th</sup>/1<sup>st</sup> EPSC at 4, 10, 20 Hz. n= 13 cells/5 WT, 20 cells/6 KO mice.

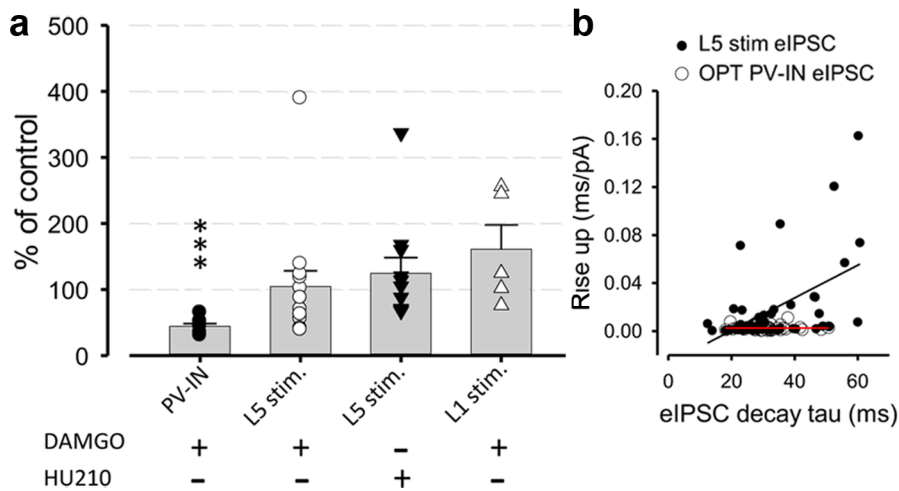

**Supplementary Figure 6** The FFI IPSC employed by L1 and L5 inputs is not sensitive to DAMGO which inhibits synaptic GABA release from the PV interneurons, nor is it sensitive to HU210 (a CB1R agonist known to block synaptic release from CCK interneurons). **(a)** For any given L2/3 pyramidal neuron, the IPSC was obtained under no stimulation (i.e., spontaneous IPSC, sIPSC) or after photoactivation of PV interneurons or electrical stimulation at L1 or L5 (evoked IPSC, eIPSC). The changes of IPSC amplitudes after treatment with DAMGO or HU210 were compared, and normalized to before treatment and expressed in %. Optogenetic-induced PV-mediated IPSC was reduced to  $44 \pm 4.2\%$  of control after DAMGO treatment. In contrast, the eIPSC elicited by L5 electrical stimulation was not sensitive to DAMGO or HU210, indicating that these eIPSC are mainly derived neither from PV nor CCK interneurons, respectively; these L5 stimulation-induced eIPSC are likely derived from SST interneurons. Similarly, L1 stimulation-induced eIPSC was not sensitive to DAMGO and was derived from non-PV interneurons, likely SST interneurons. **(b)** Correlation of IPSC decay time and rise slope indicates these L5 stimulated eIPSC inputs occur along the (distal) dendrites of L2/3 pyramidal neurons, in contrast to PV-mediated IPSCs (OPT PV-IN eIPSC) that occur at the somata of L2/3 pyramidal neurons ( $R = 0.53$ ,  $p < 0.0001$ ,  $n=51$  cells from 14 WT mice for L5 eIPSC;  $R = 0.0037$ ,  $p = 0.98$ ,  $n=41$  cells from 7 WT mice for OPT PV-IN eIPSC, optogenetic activation of PV interneurons). \*\*\*,  $p < 0.001$ .

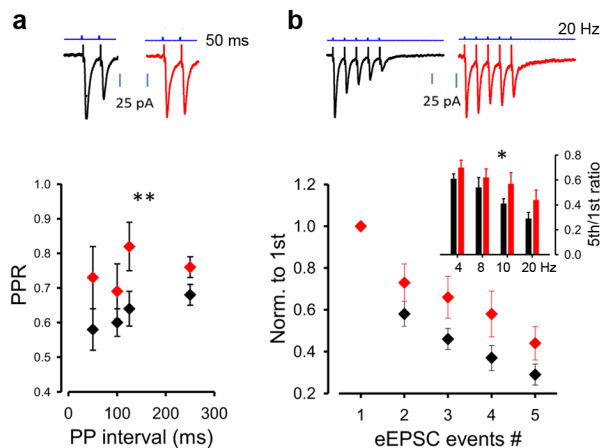

**Supplementary Figure 7** The EPSC recorded in L2/3 pyramidal neurons in response to electrical stimulation at L5 showed an increase of PPR (a) and reduced short-term depression (b, 10 Hz) in PV-*Lmo4*KO mice. (b) Inset shows the mean of the ratio of 5<sup>th</sup>/1<sup>st</sup> IPSC or EPSC at various frequencies. Representative traces are shown above each graph (WT, black; KO red). n= 13 cells/5 WT, 19-24 cells/6 KO mice. \*, \*\*, p<0.05, 0.01, respectively.



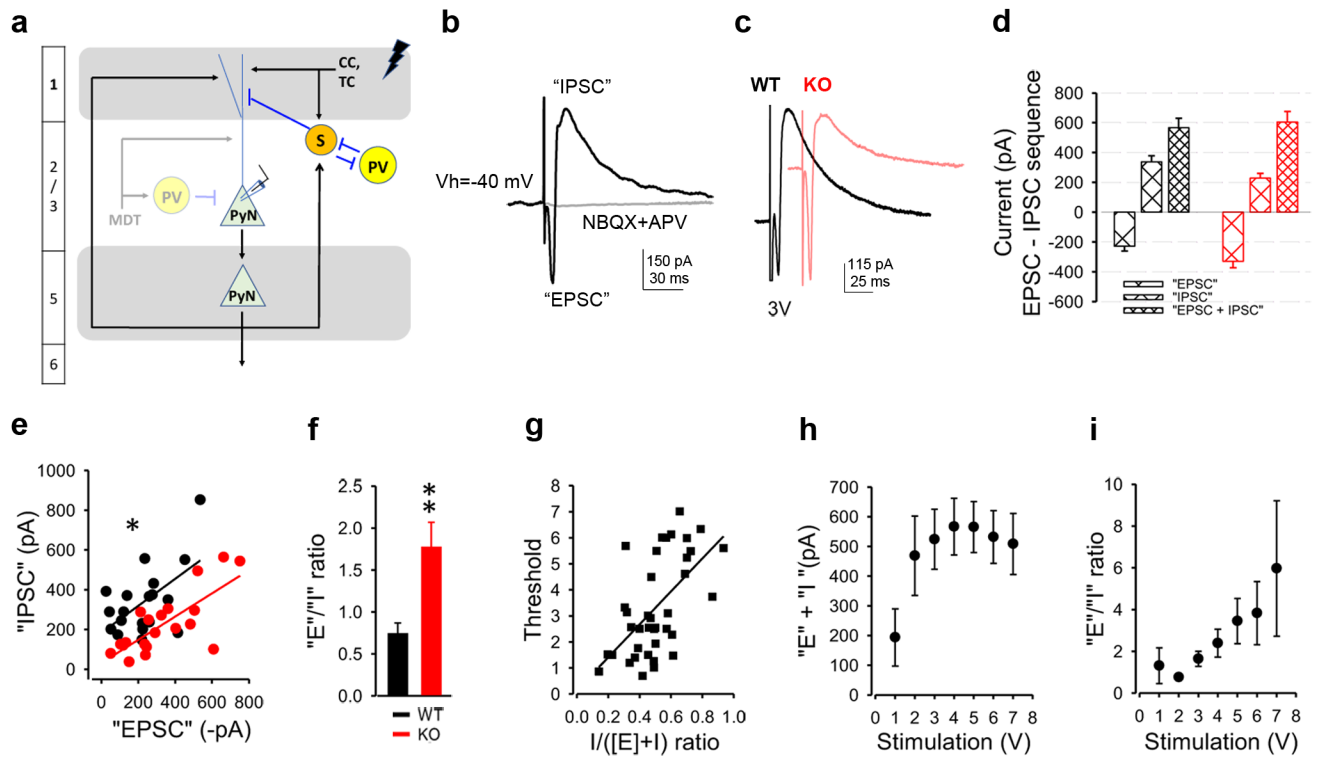

**Supplementary Figure 8** Layer 1 electrical stimulation elicits a monosynaptic EPSC and a feedforward di-synaptic IPSC at the dACC layer 2/3 pyramidal neurons. The FFI was much increased in PV-*Lmo4*KO mice. **(a)** Diagram of the inhibitory circuits and placement of stimulation electrodes at layer 1 of the ACC. **(b, c)** The excitatory and inhibitory responses were recorded with voltage clamp at -40 mV as “EPSC”, “IPSC”, respectively. The representative traces were obtained after L1 electrical stimulation at ~3V. **(b)** Blocking the synaptic response with an AMPAR blocker NBQX and a NMDAR blocker APV abolished the FFI (in grey). **(c)** Example EPSC – IPSC sequence traces of WT (black) and KO (red) show that the sum of inhibitory and excitatory responses was not different between wild type and PV-*Lmo4*KO mice, but differed in the relative proportion of “IPSC” and “EPSC” amplitudes **(d)**. **(e)** The amplitudes of “IPSC” relative to the “EPSC” fitted with linear regression showed a subtractive reduction in KO compared to WT (\*,  $p=0.03$  for intercept between WT and KO) and **(f)** the E/I ratio was much increased; this is similar to the results obtained with L5 electrical stimulation (see [Figure 5](#)).  $n=19$  cells/8 WT, 22 cells/8 KO mice for **d, e**. \*\*, 0.0023. **(g)** The threshold to elicit 50% of action potentials increases as a function of the ratio of inhibitory currents to total currents. **(h-i)** Under improved clamp preparation (with  $\text{Cs}^+$  in the pipette solution), we further tested the EPSC – IPSC sequence with step increases in stimulation. Four WT L2/3 pyramidal cells were used to assess the stimulation threshold and the responses. The total (“EPSC”+“IPSC”) currents reached a plateau when stimulation reached ~3V **(h)**, but the ratio of “EPSC”/“IPSC” increased with stimulation strength **(i)**.  $n=38$  cells/14 WT mice for **g-i**.

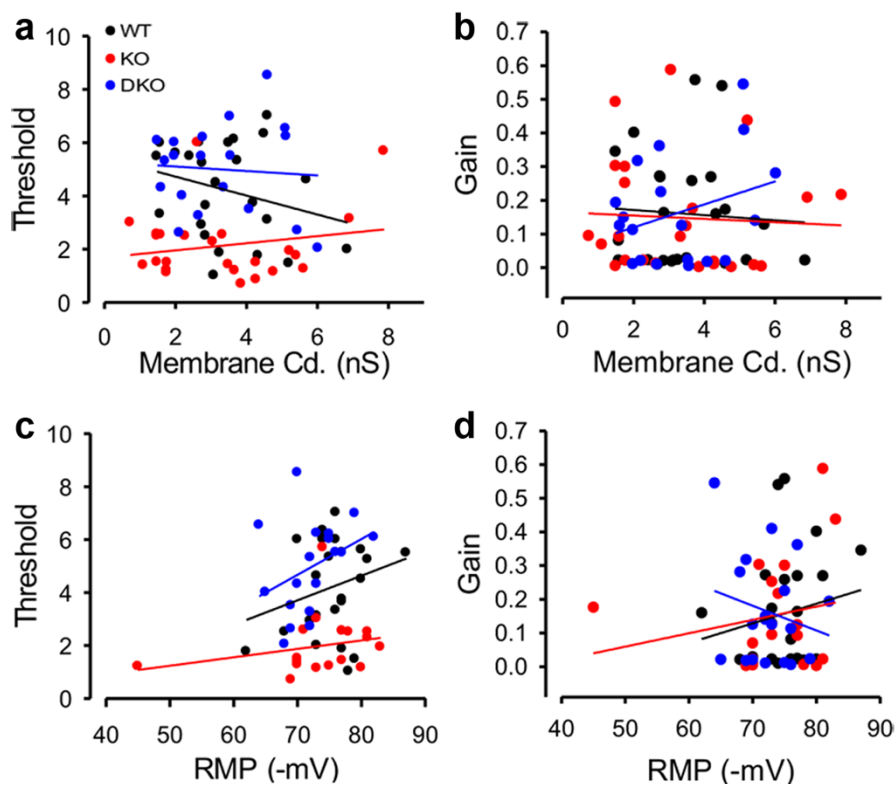

**Supplementary Figure 9** The intrinsic properties of L2/3 pyramidal neurons recruited across ranges of input strengths and gains in response to L1 stimulation. The thresholds to recruit pyramidal neurons and their gains (output responses relative to input stimuli) showed no correlation with resting membrane conductance (**a**, **b**) or resting membrane potential (**c**, **d**). KO, PV-*Lmo4*KO. n= 24 cells/8 WT, 24 cells/8 KO, 19 cells/7 DKO mice for **a-d**.

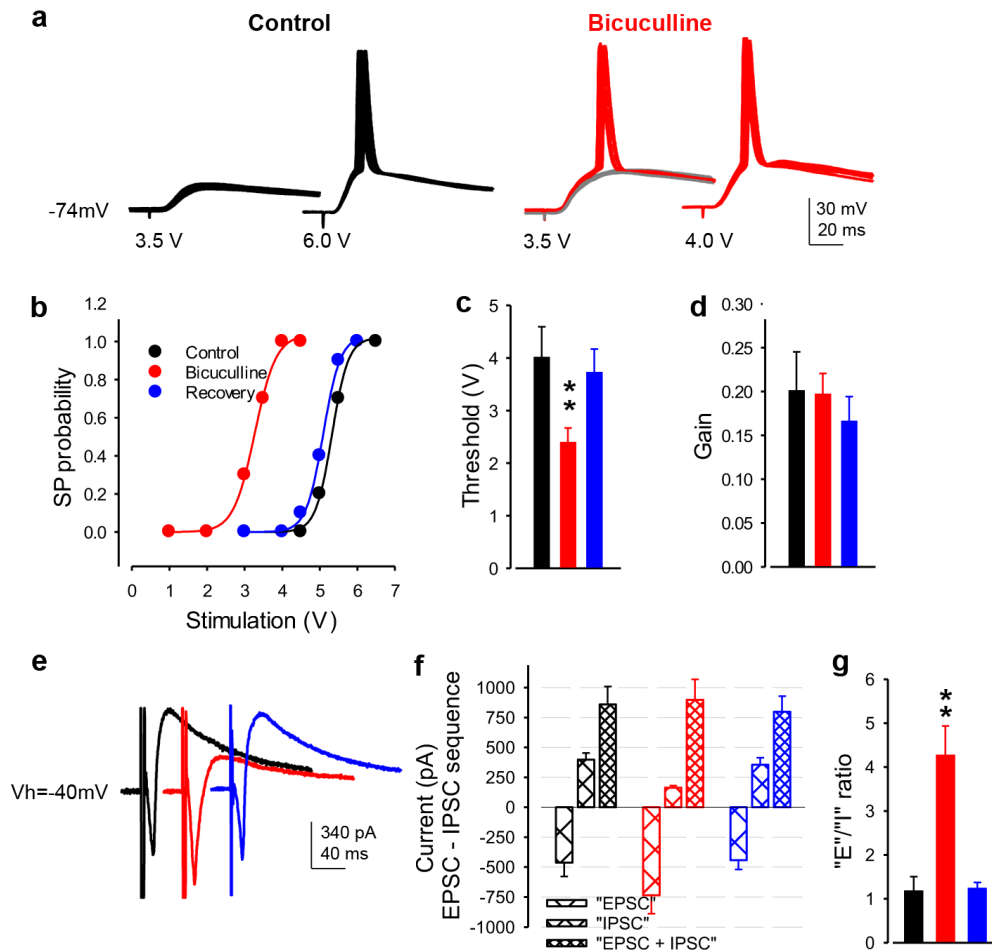

**Supplementary Figure 10** Reduced threshold of layer 2/3 dACC pyramidal neurons in response to electrical stimulation at layer 1 observed in PV-*Lmo4*KO mice can be replicated by subthreshold inhibition of GABA receptors with 2  $\mu$ M bicuculline (IC50) in wild type mice. **(a)** Sample traces of current clamp recording show that the stimulation threshold to elicit an action potential is markedly reduced from 6 V to 3.5 V in the present of bicuculline (2  $\mu$ M); 10 sweeps are overlaid for each condition. **(b)** Representative data from an individual L2/3 pyramidal neuron before (black) and after bicuculline treatment (red) and washout (blue). The stimulation threshold to elicit AP (spike probability) is reduced (leftward shifted) in the presence of bicuculline and is reversed after washout. **(c)** Average thresholds to elicit AP. n=6 cells from 4 WT mice. **(d)** Gain was not affected by treatments. For each cell subjected for current clamp studied in **a-d**, we also performed a subsequent voltage clamp recording (**e-g**). **(e)** Sample traces under voltage clamp at -40 mV show the EPSC and di-synaptic feedforward IPSC recorded at a L2/3 pyramidal neuron before (black) and after bicuculline treatment (red) and washout (blue). **(f)** Despite the sum of inhibitory and excitatory responses was not different before and after bicuculline treatment, bicuculline treatment suppressed inhibitory inputs with increased EPSC and thereby elevated the "E"/"I" ratio (**g**). \*, \*\*, \*\*\*, p<0.05, 0.01, 0.005, respectively.

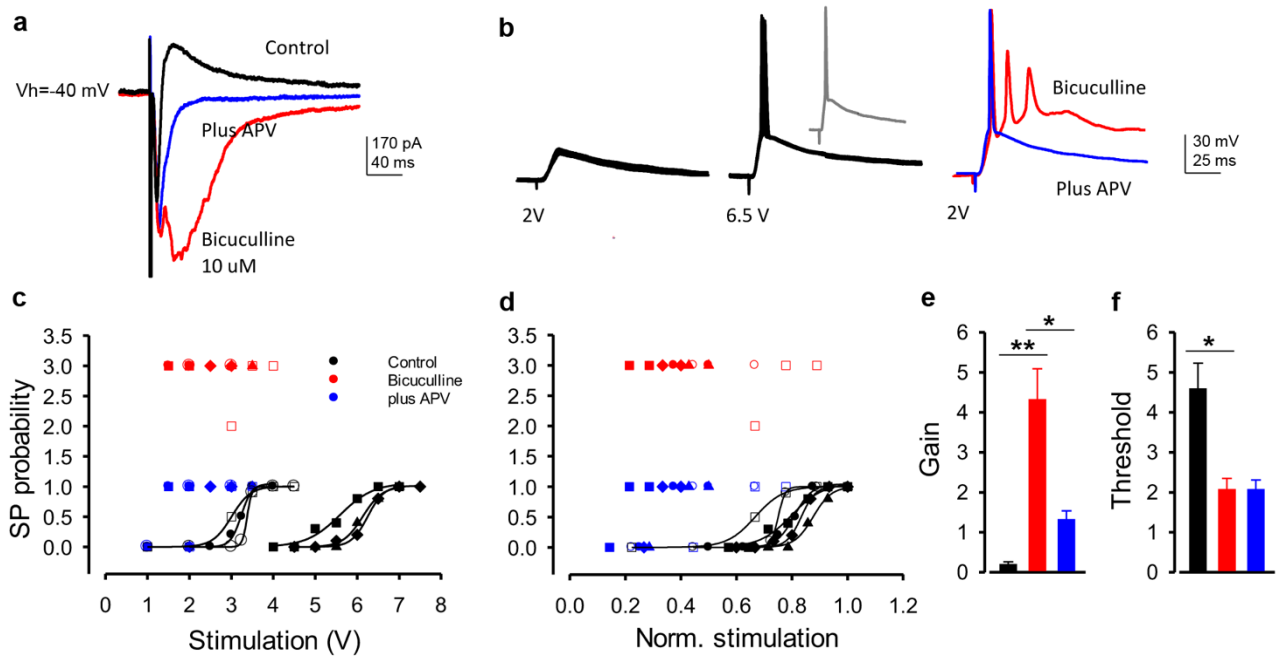

**Supplementary Figure 11** High concentration (10  $\mu$ M) of bicuculline completely blocks layer 1 GABAergic inputs and increases the spike probability. **(a)** Sample traces under voltage clamp at -40 mV show the monosynaptic EPSC and di-synaptic feedforward IPSC recorded at a L2/3 pyramidal neuron before (black) and after treatment with bicuculline (red) or bicuculline plus APV, an NMDAR blocker (blue). Complete blockade of GABAergic inputs produces larger EPSCs consisting of an early AMPAR- and a late NMDAR-mediated EPSCs; the latter can be blocked by APV. **(b)** Sample traces of current-clamp recording show that the stimulation threshold to elicit an action potential is further reduced from 6 V to 2 V in the presence of bicuculline (10  $\mu$ M). Moreover, bicuculline treatment led to bursting action potentials (red trace) that were abolished by APV (blue trace). **(c, d)** The AP probabilities over various stimulation strengths obtained from 6 cells before and after bicuculline and plus APV application. Only the control could be fitted to a sigmoid function, while a direct linear fit was used to obtain the slope and thresholds for bicuculline-treated cells. Complete blockade of GABAergic inputs abolished the pyramidal cell's ability to fine-tune its dynamic response, resulting in all-or-none AP bursting<sup>10, 11</sup>. Norm. stimulation, normalized stimulation. **(e)** 10  $\mu$ M bicuculline markedly increases the gain, and a majority of the gain is mediated via NMDAR as it was diminished by the addition of APV (blue). **(f)** Blocking GABAergic inputs lowered the thresholds of stimuli to elicit APs that were not affected by additional treatment with APV. \*, \*\*,  $p < 0.05$ ,  $0.01$ .  $n = 6$  cells/4 WT/treatment for **c-f**.

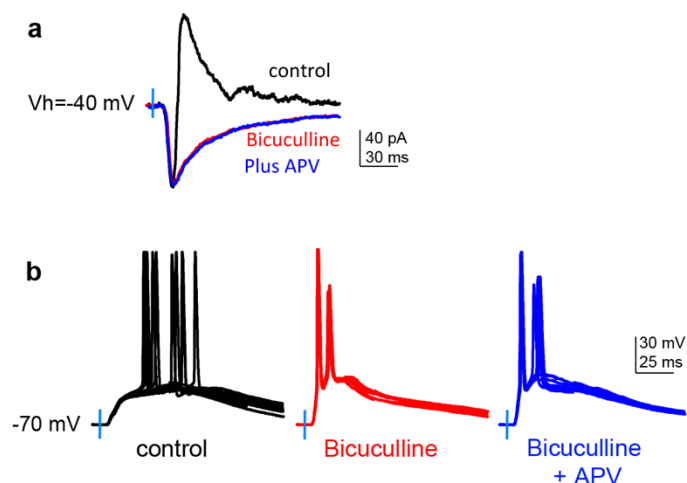

**Supplementary Figure 12** High concentration (10  $\mu$ M) of bicuculline completely blocked MD thalamocortical GABAergic inputs and increased L2/3 pyramidal neuron spike probability. **(a)** Sample traces under voltage clamp at -40 mV show the monosynaptic EPSC and di-synaptic feedforward IPSC recorded at a L2/3 pyramidal neuron before (black) and after treatment with bicuculline (red) or bicuculline plus an NMDAR blocker APV (blue). In contrast to L1 electrical stimulation (**Supplementary Fig. 11a**), blockade of MD thalamic GABAergic inputs revealed that the EPSC consisted of only an APV-insensitive AMPAR-mediated EPSC. **(b)** 10 sample traces of current clamp recording after each photostimulation before and after treatment with bicuculline (red) or bicuculline plus APV (blue) were overlaid and compared. Blocking GABAergic input increases the numbers of APs elicited (from 9 to 20 AP for total 10 recording sweeps) and APV treatment did not affect AP production, in contrast to what we observed during L1 electrical stimulation (**Supplementary Fig. 11b**). N=5 cells from 3 mice.

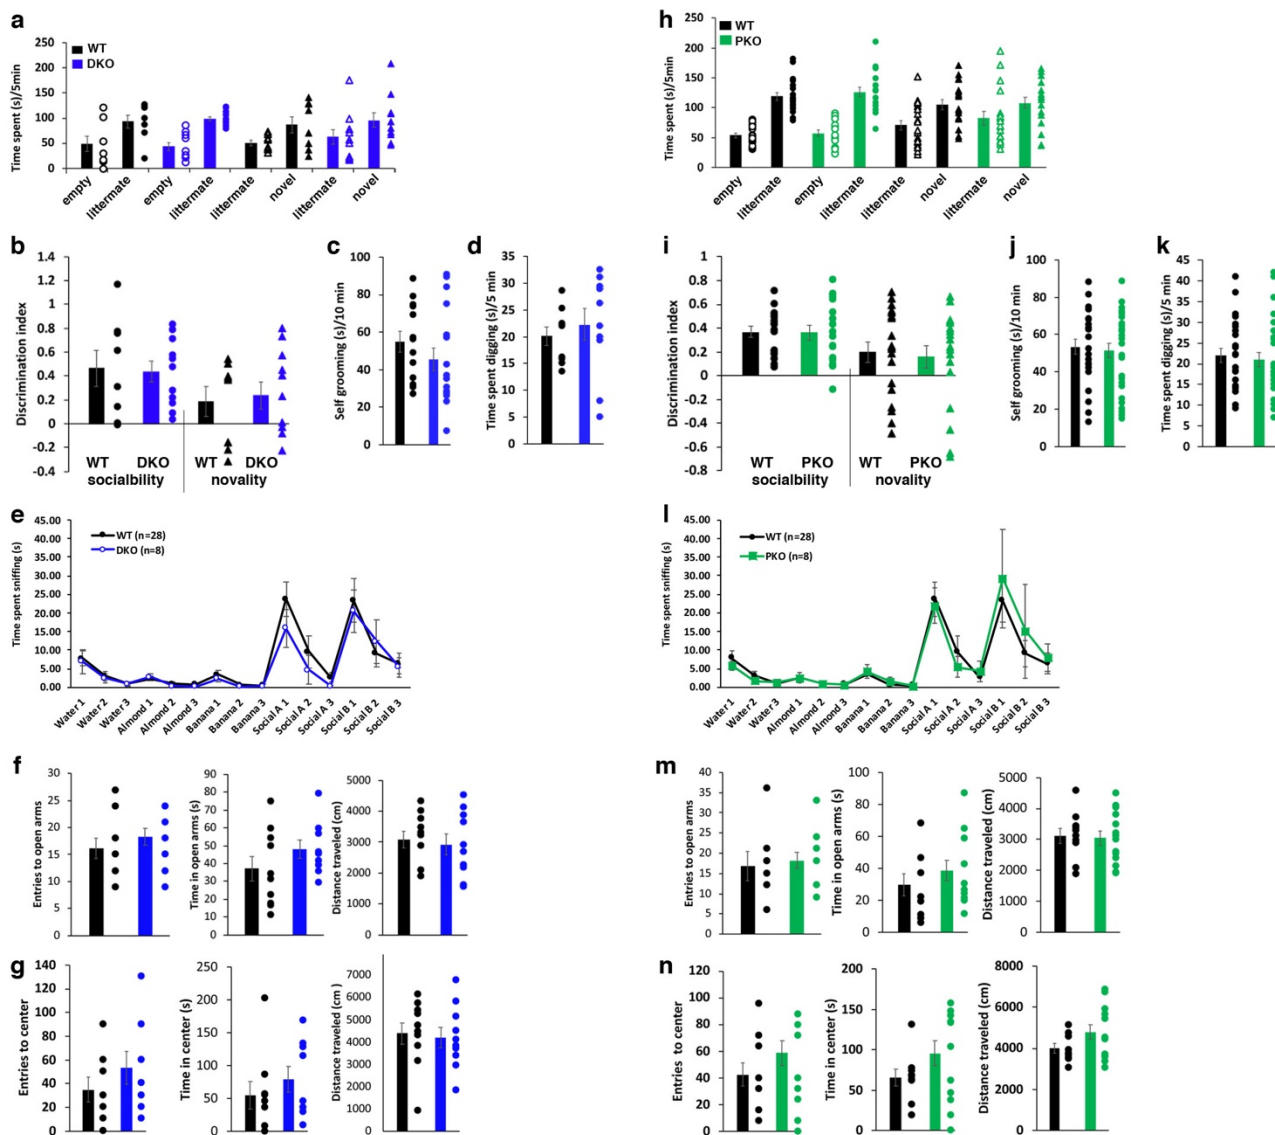

**Supplementary Figure 13** Behavior tests of PV-DKO (**a-g**) and PV-PTP1BKO (PKO) mice (**h-n**). **(a)** Time spent in social interaction and novelty tests, used for discrimination index in **(b)** and Figure 7a. n=14 WT, 11 DKO. Time spent in **(c)** self-grooming and **(d)** digging. **(e)** Olfactory response measured as time spent sniffing non-social and social odors. n=28 WT, 8 DKO. **(f)** Elevated plus maze test. **(g)** Open field test. n=10 WT, 9 DKO (d, e). **(h-n)** Same behavior tests carried out for PKO mice. n= 19 WT, 18 PKO (h, i), 24 WT, 29 PKO (j, k), 28 WT, 9 PKO (l), 9WT, 13 PKO (m, n).

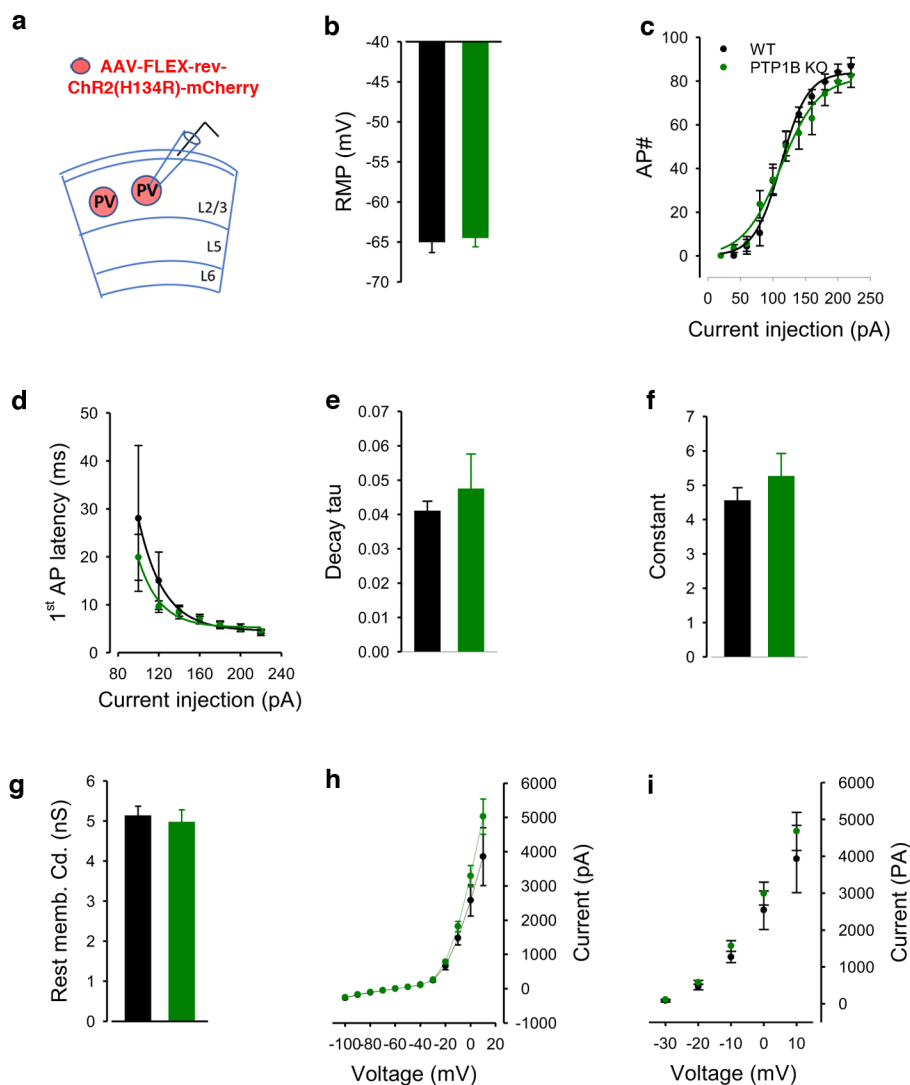

**Supplementary Figure 14** PV interneuron properties are normal in PV-PTP1BKO mice. **(a)** Diagram of AAV9 vectors expressing cre-dependent mCherry stereotactically injected to the dACC of WT (PV-Cre/PTP1B<sup>WT/WT</sup>) or PKO (PV-Cre/PTP1B<sup>flox/flox</sup>) mice to label PV neurons. **(b)** Resting membrane potential, **(c)** membrane excitability (current injection–action potential curve, fitted to a sigmoidal function). **(d-f)** Latency to first action potential. Current injection–1<sup>st</sup> AP latency, fitted to a three-parameter exponential decay, revealed a similar decay tau **(e)**, and time constant **(f)**. **(g)** Resting membrane conductance. **(h, i)** I-V curves: WT (black) and PKO (green); **i**, isolated delayed rectified potassium currents. n= 11 cells/4 WT, 32 cells/5 PKO mice for **b-i**.

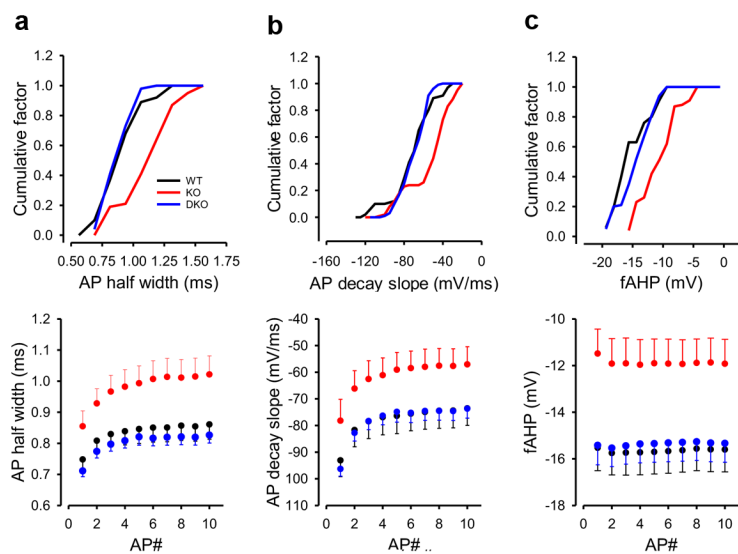

**Supplementary Figure 15** Most PV interneuron properties are normalized in PV-DKO mice, including action potential width (**a**), decay slope (**b**), and the fast afterhyperpolarization (fAHP) (**c**). n= 11 cells/5 WT, 13 cells/5 KO (PV-*Lmo4*KO), 20 cells/7 DKO mice.



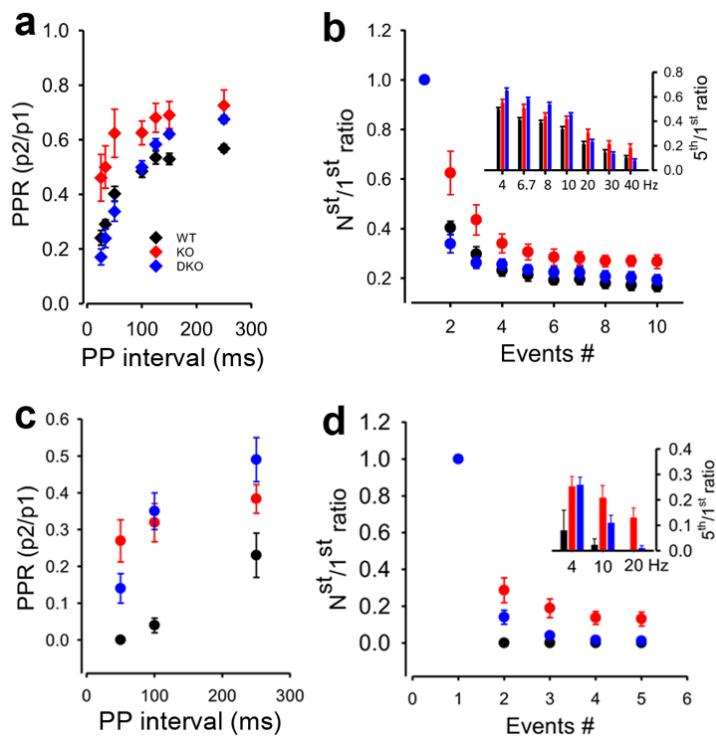

**Supplementary Figure 16** PV-DKO mice normalized PV-mediated inhibitory inputs onto layer 2/3 pyramidal neurons either by direct photo-activation of PV interneurons (**a, b**) or by indirect photo-activation of thalamocortical projections to the dACC (**c, d**). (**a, c**) The paired pulse ratio and (**b, d**) short-term depression of inhibitory currents are shown.  $n = 11$  cells/4 WT, 14 cells/5 KO, 18 cells/6 DKO mice.

**Supplementary Table 1 Results of statistical analysis for main figures.**

| Fig.     |                                                                                                                   | t or z   | p        | n                                   | Anova                                                                                              |
|----------|-------------------------------------------------------------------------------------------------------------------|----------|----------|-------------------------------------|----------------------------------------------------------------------------------------------------|
| 1a       | Sociability: $0.44 \pm 0.05$ , $0.20 \pm 0.06$                                                                    | 2.647    | 0.0155   | 8 WT, 14 KO                         |                                                                                                    |
|          | Novelty: $0.21 \pm 0.08$ ; $-0.8 \pm 0.09$                                                                        | 2.240    | 0.0379   | 7 WT, 13 KO                         |                                                                                                    |
| 1b       | Grooming: $57.71 \pm 6.71$ , $115.4 \pm 12.93$                                                                    | -3.483   | 0.0033   | 7 WT, 10 KO                         |                                                                                                    |
| 1c       | Digging: $14.88 \pm 3.40$ , $31.36 \pm 5.34$                                                                      | -2.376   | 0.0290   | 8 WT, 11 KO                         |                                                                                                    |
| 1d       | cFos+ neurons in ACC                                                                                              |          |          | 4WT NSI, 4WT SI,<br>4KO NSI, 4KO SI | (see below in Fig 7c)                                                                              |
| 2b       | RMP: WT: $-65.4 \pm 1.3$ , KO: $-58.8 \pm 2.1$ mV                                                                 | -2.650   | 0.0150   |                                     |                                                                                                    |
| 2c       | threshold: WT, $112.3 \pm 2.4$ ; KO, $91.1 \pm 2.4$ pA                                                            | -6.130   | < 0.0001 |                                     |                                                                                                    |
|          | increased slope: WT, $20.6 \pm 2.0$ ; KO, $26.1 \pm 2.1$ ,<br>max. AP#: WT, $83.9 \pm 2.1$ ; KO, $91.2 \pm 1.9$ , | 1.900    | 0.0300   | 9-11 cells/5 WT,<br>18-3 cells/5 KO |                                                                                                    |
| 2e       | WT, $0.0412 \pm 0.0027$ ; KO, $0.0202 \pm 0.0042$ ms/pA                                                           | 4.200    | < 0.0001 | mice                                |                                                                                                    |
| 2f       | time constant: WT, $4.56 \pm 0.36$ ; KO, $3.11 \pm 0.47$ ms                                                       | -2.450   | 0.0070   |                                     |                                                                                                    |
| 2g       | Cd (nS) : WT $5.1 \pm 0.2$ ; KO $3.8 \pm 0.4$                                                                     | 3.000    | 0.0075   |                                     |                                                                                                    |
| 2i       |                                                                                                                   |          |          |                                     | Genotypes F(1,110) = 6.22, p = 0.015<br>Genotypes*Voltages F(4,110) = 1.45, p = 0.226              |
| 3c inset | WT $52.53 \pm 4.12$ , KO $90.1 \pm 11.3$ ; MW U 205                                                               |          | < 0.001  |                                     |                                                                                                    |
| 3d inset | WT $23.96 \pm 1.08$ , KO $23.47 \pm 1.90$ ; MW U 348                                                              |          | 0.2660   |                                     |                                                                                                    |
| 3e inset | WT $5.96 \pm 0.43$ , KO $4.93 \pm 0.49$ ; MW U 322.5                                                              |          | 0.1310   |                                     |                                                                                                    |
| 3f inset | WT $31.1 \pm 3.2$ , KO $26.1 \pm 1.86$ ; MW U 352.5                                                               |          | 0.2970   |                                     |                                                                                                    |
| 3g inset | WT $8.08 \pm 0.56$ , KO $7.9 \pm 0.46$ ; MW U 413.5                                                               |          | 0.9260   |                                     |                                                                                                    |
| 3h inset | WT $6.14 \pm 1.31$ , KO $6.39 \pm 1.26$ ; MW U 406                                                                |          | 0.8340   |                                     |                                                                                                    |
| 3i       | linear regression (R = 0.64, p < 0.001 for WT; R = 0.61, p < 0.001 for KO) were observed in KO                    |          |          | 26 cells/8 WT, 24 cells/8 KO mice   |                                                                                                    |
|          | slope: WT: $0.88 \pm 0.20$ , KO: $3.46 \pm 0.88$                                                                  | 2.860    | 0.0021   |                                     |                                                                                                    |
|          | intercept: WT $22.9 \pm 6.7$ , KO: $-2.8 \pm 23.4$                                                                | -1.100   | 0.1500   |                                     |                                                                                                    |
| 3j       | sEPSC WT $-31.1 \pm 3.2$ , KO $-26.1 \pm 1.86$ pA                                                                 | -1.300   | 0.1970   |                                     |                                                                                                    |
|          | sIPSC WT $52.5 \pm 4.1$ , KO $90.1 \pm 11.7$ pA                                                                   | 3.220    | 0.0023   |                                     |                                                                                                    |
| 3k       | E/I ratio WT $0.62 \pm 0.05$ , KO $0.34 \pm 0.03$                                                                 | 1.690    | 0.0048   |                                     |                                                                                                    |
| 4c       | E-I relationship R = 0.76, p < 0.001 for WT; R = 0.9, p < 0.0001 for KO                                           |          |          | 21 cells/ 7 WT, 23 cells/ 8 KO      |                                                                                                    |
|          | The slope, WT: $3.0 \pm 0.6$ , KO: $14.5 \pm 1.8$                                                                 | 2.550    | 0.0054   |                                     |                                                                                                    |
|          | The intercept, WT: $76.4 \pm 71.0$ , KO: $38.7 \pm 169.0$                                                         | -0.090   | 0.4600   |                                     |                                                                                                    |
| 4d       | eEPSC WT $78.8 \pm 21.4$ , KO $80.0 \pm 15.2$                                                                     | -0.050   | 0.9600   |                                     |                                                                                                    |
|          | eIPSC WT: $282.5 \pm 82.2$ pA, KO: $1129.3 \pm 247.1$ pA                                                          | -3.100   | 0.0035   |                                     |                                                                                                    |
| 4e       | E/I ratio WT $0.49 \pm 0.11$ , KO $0.11 \pm 0.01$                                                                 | 3.690    | 0.0006   |                                     |                                                                                                    |
| 4f       | Latency WT: $3.51 \pm 0.43$ , KO: $2.17 \pm 0.39$                                                                 | 2.300    | 0.0265   |                                     |                                                                                                    |
| 4h       | PPR                                                                                                               |          | 0.0000   |                                     | Genotypes*pulse_duration F(2,129) = 1.23, p = 0.3;<br>Genotype F(1,129) = 35.2, p < 0.00001        |
| 4j       | short-term depression                                                                                             |          | 0.0007   |                                     | Genotype*frequency F(1,129) = 0.47, p = 0.63, Genotype F(1,129) = 12.1, p = 0.0007 (5th/1st ratio) |
|          |                                                                                                                   |          | < 0.0001 |                                     | 4, 10 and 20 Hz, F(1,26) = 240, 121 and 113, p < 0.0001 for all (repeat measurement)               |
| 4n       | maximum spike probability WT: $1.24 \pm 0.11$ , KO: $0.80 \pm 0.08$ , MW U = 22                                   |          | 0.0150   | 15 cells/6WT, 8 cells/4KO mice      |                                                                                                    |
| 4o       | stimulation threshold WT: $535.6 \pm 41.2$ , KO: $237.8 \pm 30.0$ mA.ms                                           | -5.85    | < 0.0001 |                                     |                                                                                                    |
| 4p       | gain WT: $0.0024 \pm 0.0003$ , KO: $0.0101 \pm 0.0031$ , MW U = 17.5                                              |          | 0.0070   |                                     |                                                                                                    |
| 5c       | slope: WT: $2.05 \pm 0.69$ , KO: $1.68 \pm 0.58$                                                                  | -0.400   | 0.3400   | 38 cel/s/117 WT, 13 cells/5 KO mice |                                                                                                    |
|          | intercept: WT: $1115.1 \pm 234.8$ , KO: $-44.3 \pm 203.9$                                                         | -3.7     | 0.0001   |                                     |                                                                                                    |
| 5d       | excitatory inputs WT: $255 \pm 37$ , KO: $297 \pm 54$ pA, MW U=190.5                                              |          | 0.1900   |                                     |                                                                                                    |
|          | inhibitory inputs WT: $1638 \pm 170.8$ , KO: $457.3 \pm 137$ pA, MW U=57                                          |          | <0.001   |                                     |                                                                                                    |
| 5e       | E/I ratio WT: $0.185 \pm 0.019$ ; KO: $0.895 \pm 0.124$ , MW U = 17                                               |          | <0.001   |                                     |                                                                                                    |
| 5f       | latency WT $2.89 \pm 0.30$ , KO $2.90 \pm 0.35$ ms                                                                | -0.00875 | 0.99     |                                     |                                                                                                    |
| 5g, h    | PPR                                                                                                               |          |          | 14 cells/5 WT, 11 cells/5 KO mice   | genotype*pulse_duration F(3,92) = 0.18, p = 0.90;<br>genotype F(1,92) = 7.94, p = 0.0018.          |
|          | short term plasticity                                                                                             |          |          |                                     | genotype*frequency F(3,92) = 0.14, p = 0.94; genotype F(1,92) = 6.2, p = 0.015).                   |
| 6e       | threshold, WT: $4.2 \pm 0.4$ , KO: $2.1 \pm 0.3$                                                                  | 4.5      | < 0.0001 | 24 cell/8WT, 24 cells/8KO mice      |                                                                                                    |
| 6f       | gain, WT: $0.16 \pm 0.035$ , KO: $0.15 \pm 0.035$ , MW U = 247                                                    |          | 0.4      |                                     |                                                                                                    |

|    |                                                                                                                                        |        |        |                                                        |                                                                                                                                                                                                                                                                                                                                     |
|----|----------------------------------------------------------------------------------------------------------------------------------------|--------|--------|--------------------------------------------------------|-------------------------------------------------------------------------------------------------------------------------------------------------------------------------------------------------------------------------------------------------------------------------------------------------------------------------------------|
| 7a | Sociability                                                                                                                            | -0.361 | 0.7230 | 14 WT, 14 LKO, 11 DKO                                  | F(2, 36)=3.919, p=0.0288; Tukey post-hoc WT:0.483 ± 0.076; LKO: 0.201 ± 0.059; DKO: 0.424 ± 0.086; WT vs LKO: p=0.034; WT vs DKO: p>0.999                                                                                                                                                                                           |
|    | Novelty                                                                                                                                | -0.381 | 0.7080 | 15 WT, 13 LKO, 11 DKO                                  | F(2, 36)=3.917, p=0.029; Tukey post-hoc WT:0.198 ± 0.075; LKO: -0.085 ± 0.086; DKO: 0.239 ± 0.113; WT vs LKO: p=0.0297; WT vs DKO: p=0.051                                                                                                                                                                                          |
| 7b | Grooming                                                                                                                               | 1.089  | 0.2860 | 20 WT, 10 LKO, 17 DKO                                  | F(2, 44)=22.697, p=1.68705E-07; Tukey post-hoc WT:55.931 ± 4.298; LKO: -115.4 ± 12.927; DKO: 45.538 ± 6.182; WT vs LKO: p<0.0001; WT vs DKO: p=0.4093                                                                                                                                                                               |
|    | Digging                                                                                                                                | -0.590 | 0.5630 | 17 WT, 11 LKO, 10 DKO                                  | F(2, 35)=4.473, p=0.0186; post-hoc WT:17.656 ± 1.899; LKO: -31.363 ± 5.343; DKO: 22.230 ± 2.996; WT vs LKO: p=0.0098; WT vs DKO: p=0.5299                                                                                                                                                                                           |
| 7c | c-Fos+ neurons in ACC. WT NSI: 1 ± 0.49, WT SI: 8.11 ± 1.48; KO NSI: 0.01 ± 0.01; KO SI 3.71 ± 0.23; DKO NSI 0 ± 0; DKO SI 5.04 ± 0.61 |        |        | 4 WT NSI, 4WT SI, 4LKO NSI, 4LKO SI, 4DKO NSI, 4DKO SI | SI: F (1, 18) = 87.52, P < 0.0001; genotype: F (2, 18) = 8.263, P = 0.0028; interaction: F (2, 18) = 3.100, P = 0.0697. Post-hoc Bonferroni's multiple comparisons test: NSI: WT vs. SI: WT, p < 0.0001; NSI: LKO vs. SI: LKO, p = 0.0206; DKO NSI vs DKO SI, p = 0.0010; WT SI vs LKO SI, p = 0.0041. WT ST vs DKO SI, p = 0.0840. |
| 7d | RMP                                                                                                                                    |        |        | 9-11 cells/ 5 WT, 8-13 cells/5 KO, 16-20 cells/7 DKO   | F (2, 41) = 5.3, p = 0.009; post-hoc WT: -65 ± 1.3, DKO: 65 ± 1.2 mV, t = 0.16, p = 1.0                                                                                                                                                                                                                                             |
| 7e | threshold: WT, 112.3 ± 2.5; DKO, 126.3 ± 3.1 pA                                                                                        | -3.500 | 0.0001 |                                                        |                                                                                                                                                                                                                                                                                                                                     |
|    | maximum AP#: WT, 84 ± 2.1; DKO, 83 ± 2.6                                                                                               | -0.290 | 0.3900 |                                                        |                                                                                                                                                                                                                                                                                                                                     |
| 7f | decay tau WT, 0.04 ± 0.003; DKO, 0.033 ± 0.010                                                                                         | -0.800 | 0.2200 |                                                        |                                                                                                                                                                                                                                                                                                                                     |
|    | constant: WT, 4.6 ± 0.4; DKO, 5.6 ± 1.0                                                                                                | 0.990  | 0.1600 |                                                        |                                                                                                                                                                                                                                                                                                                                     |
| 7g | Rest membrane conductance                                                                                                              |        |        |                                                        | F (2, 41) = 4.4, p = 0.019; post-hoc WT: 5.14 ± 0.23, DKO: 4.93 ± 0.35 nS, t = 0.44, p = 1.0                                                                                                                                                                                                                                        |
| 7i | isolated delayed rectifiers                                                                                                            |        |        |                                                        | Genotypes F(1,145) = 19.92, p = 1.74 x 10 <sup>-5</sup> ; Genotypes*Voltages F(4,145) = 4.04, p = 0.00398                                                                                                                                                                                                                           |
| 8a | E-I relationship R = 0.76, p < 0.001 for WT; R = 0.76, p < 0.0001 for DKO                                                              |        |        | 21 cells/ 7 WT, 23 cell/8 KO, 35 cells/12 DKO mice     |                                                                                                                                                                                                                                                                                                                                     |
|    | The slope, WT: 3.0 ± 0.6, DKO: 2.30 ± 0.334                                                                                            | -1.015 | 0.4600 |                                                        |                                                                                                                                                                                                                                                                                                                                     |
|    | The intercept, WT: 76.4 ± 71.0, DKO: 69.4 ± 106                                                                                        | -0.055 | 0.4800 |                                                        |                                                                                                                                                                                                                                                                                                                                     |
| 8b | E/I ratio                                                                                                                              |        |        |                                                        | F (2, 70) = 6.3, p = 0.003, post-hoc WT: 0.49 ± 0.11, DKO: 0.56 ± 0.10, t = 0.47, p = 1.0                                                                                                                                                                                                                                           |
| 8c | latency                                                                                                                                |        |        |                                                        | F (2, 70) = 4.0, p = 0.024, post-hoc WT: 3.5 ± 0.4, DKO: 3.3 ± 0.3 ms, t = 0.43, p = 1.0                                                                                                                                                                                                                                            |
| 8f | Max SP probability                                                                                                                     |        |        | 15 cells/5WT, 8 cells                                  | H(2) = 10.44, p = 0.005; WT: 1.24 ± 0.11, DKO: 1.11 ± 0.06, Q = 0.94, p = 1.0; KO: 0.80 ± 0.08, DKO: 1.11 ± 0.06, Q = 3.10, p = 0.006                                                                                                                                                                                               |
| 8g | threshold                                                                                                                              |        |        |                                                        | F(2,29) = 19.034, p < 0.001; WT: 237.8 ± 30.0, DKO: 231.6 ± 42.1 mA.ms, t = 0.12, p = 1.0; KO: 535.6 ± 41.2, DKO: 231.6 ± 42.1 mA.ms, t = 5.25, p < 0.001                                                                                                                                                                           |
| 8h | gain                                                                                                                                   |        |        |                                                        | H(2) = 9.64, p = 0.008, WT: 1.0x10 <sup>-2</sup> , DKO: 7.7x10 <sup>-3</sup> , Q = 0.29, p = 1.0; KO: 2.4x10 <sup>-3</sup> , DKO: 7.7x10 <sup>-3</sup> , t = 2.75, p = 0.018.                                                                                                                                                       |
| 8k | gain (L1 input)                                                                                                                        |        |        | 24 cells/8WT, 24 cells                                 | H(2) = 0.83, p = 0.66                                                                                                                                                                                                                                                                                                               |
| 8l | threshold (L1 input)                                                                                                                   |        |        |                                                        | F(2,64) = 18.6, p < 0.001; WT: 4.2 ± 0.4, DKO: 5.0 ± 0.4 V, t = 1.6, p = 0.34; KO: 2.1 ± 0.3, DKO: 5.0 ± 0.4, t = 5.8, p < 0.001                                                                                                                                                                                                    |

**Supplementary Table 2 Results of statistical analysis for supplementary figures.**

| Fig.      |                                                                                                                                                                                                                                                                                                                                                                                                        | t or z                              | p                                    | n                                                                                                                               | df |       |
|-----------|--------------------------------------------------------------------------------------------------------------------------------------------------------------------------------------------------------------------------------------------------------------------------------------------------------------------------------------------------------------------------------------------------------|-------------------------------------|--------------------------------------|---------------------------------------------------------------------------------------------------------------------------------|----|-------|
| S1        | OF (Entries): 50.82 ± 2.68; 50.67 ± 3.68                                                                                                                                                                                                                                                                                                                                                               | 0.035                               | 0.9720                               | 17 WT, 12 LKO                                                                                                                   | 27 | ttest |
| S1        | OF (Time): 86.42 ± 7.59; 87.93 ± 11.70                                                                                                                                                                                                                                                                                                                                                                 | -0.113                              | 0.9106                               | 16 WT, 12 LKO                                                                                                                   | 26 | ttest |
| S1        | OF (Distance): 4399 ± 153; 4591 ± 235                                                                                                                                                                                                                                                                                                                                                                  | -0.71687                            | 0.479394                             | 18 WT, 12 LKO                                                                                                                   | 28 | ttest |
| S1        | EPM (Entries): 15.00 ± 1.49; 12.67 ± 1.78                                                                                                                                                                                                                                                                                                                                                              | 1.00225                             | 0.324804                             | 18 WT, 12 LKO                                                                                                                   | 28 | ttest |
| S1        | EPM (Time): 42.25 ± 8.32; 44.77 ± 7.48                                                                                                                                                                                                                                                                                                                                                                 | -0.2115                             | 0.834029                             | 18 WT, 12 LKO                                                                                                                   | 28 | ttest |
| S1        | EPM (Distance): 3117 ± 89; 2939 ± 123                                                                                                                                                                                                                                                                                                                                                                  | 1.19556                             | 0.242264                             | 18 WT, 11 LKO                                                                                                                   | 27 | ttest |
| S1        | Olfactory function (see S13)                                                                                                                                                                                                                                                                                                                                                                           |                                     |                                      | 28 WT, 12 LKO                                                                                                                   |    |       |
| S3b, c, d | ANOVA: (b) genotype*AP# F(9,190) = 0.07, p = 0.99; genotype F(2,190) = 42.4, p < 0.0001). (c) genotype*AP# F(9,190) = 0.007, p = 0.99; genotype F(1, 190) = 30.7, p < 0.0001. (d) genotype*AP# F(9, 190) = 0.006, p = 0.99; genotype F(1, 190) = 71.1, p < 0.00001)                                                                                                                                    |                                     |                                      | 11 cells/5 WT, 10 cells/5 KO mice                                                                                               |    |       |
| S3e       | ANOVA Genotypes F(2,351) = 0.29, p = 0.745; Genotypes*Voltages F(16,351) = 0.08, p = 0.999                                                                                                                                                                                                                                                                                                             |                                     |                                      | 19 cells/4 WT, 12 cells/3 KO, 11 cells/3 DKO mice                                                                               |    |       |
| S4        | (b) PPR: ANOVA, genotype*pulse_duration F(6,200) = 0.33, p = 0.92; genotype F(1,200) = 56.6, p < 0.0001.<br>(c) Short-term depression: ANOVA, genotype*frequency F(6,174) = 0.22, p = 0.97; genotype F(1,174) = 28.9, p < 0.0001.<br>(e) repeated ANOVA for all frequencies F(1,23) = 4.3, 7.3, 4.7, 6.9, 6.0, 5.5, 4.8, p < 0.05 for all.<br><br>(d) IPSC decay time vs. rise slope                   |                                     |                                      | 19 cells/8 WT, 16 cells/8 KO mice for PPR. 11 cells/6 WT, 14 cells/5 KO mice for STD<br><br>22 cells/7 WT, 19 cells/7 KO mice   |    |       |
| S5        | (a) genotype*pulse_duration F(2,81) = 0.36, p = 0.7, genotype F(1,81) = 0.016, p = 0.90<br>(b) genotype**frequency F(2,71) = 0.29, p = 0.75, genotype F(1,71) = 0.2, p = 0.650                                                                                                                                                                                                                         |                                     |                                      | 15 cells/5 WT, 11 cells/6 KO mice                                                                                               |    |       |
| S6        | (a) DMAGO: OPT PV-IN 44 ± 4.2%<br>(a) DMAGO: L5 stimulation: 104.4 ± 23.6%<br>(a) HU210: L5 stimulation: 124.5 ± 28.8%<br>(a) DAMGO L1 stimulation: 161.1 ± 37.0%<br>(b) Correlation of IPSC decay time vs. rise slope: R = 0.53, p < 0.0001, for L5 eIPSC<br>(b) Correlation of IPSC decay time vs. rise slope: R = 0.0037, p = 0.98, for OPT PV-IN eIPSC (optogenetic activation of PV interneurons) | 13.200<br>-0.19<br>-1.030<br>-1.600 | < 0.0001<br>0.85<br>0.3300<br>0.1800 | 8 cells/4 WT mice<br>14 cells/5 WT mice<br>11 cells/5 WT mice<br>6 cells/4 WT mice<br>51 cells/14 WT mice<br>41 cells/7 WT mice |    |       |
| S7        | (a) ANOVA, genotype*pulse_duration F(3,93) = 0.31, p = 0.81; genotype F(1,93) = 9.4, p = 0.0029. (b) ANOVA, genotype*frequency F(3,93) = 0.43, p = 0.73; genotype F(1,93) = 5.2, p = 0.0025.                                                                                                                                                                                                           |                                     |                                      | 15 cells/5 WT, 11 cells/6 KO mice                                                                                               |    |       |
| S8        | (e) The amplitudes of "IPSC" relative to the "EPSC" fitted with liner regression: R = 0.56 m, p = 0.012 for WT; R = 0.75, p = 0.0001 for KO. (slope: WT: 0.68 ± 0.24, KO: 0.58 ± 0.12, Z = -0.35, p = 0.36; intercept: WT: 183.0 ± 64.8, KO: 31.1 ± 46.7, Z = -1.9, p = 0.03)<br>(g) threshold/(I([E]+I)): R = 0.59, p < 0.0001<br>(f) "E/I" ratio WT 0.75 ± 0.12, KO 1.82 ± 0.30                      |                                     |                                      | 19 cells/8 WT, 22 cells/8 KO mice                                                                                               |    |       |
| S9        | (a) threshold: Cd: WT R = 0.26, p = 0.21; KO R = 0.18, p = 0.36; DKO R = 0.07, p = 0.77.<br>(b) gain: WT R = 0.06, p = 0.78; KO R = 0.06, p = 0.80; DKO R = 0.31, p = 0.20<br>(c) threshold: RMP: WT R = 0.25, p = 0.24; KO R = 0.23, p = 0.35; DKO R = 0.36, p = 0.13.<br>(d) gain: RMP: WT R = 0.17, p = 0.44; KO R = 0.19, p = 0.44; DKO R = 0.21, p = 0.38).                                       |                                     |                                      | 24 cells/8 WT, 24 cells/8 KO, 19 cells/7 DKO mice                                                                               |    |       |
| S10       | (c) AP thresholds WT 4.01 ± 0.58, bicucu 2.40 ± 0.27, recovery 3.73 ± 0.43<br>(d) gain WT 0.20 ± 0.04, bicucu 0.20 ± 0.023, recovery 0.17 ± 0.028<br>(g) "E/I" ratio WT 1.19 ± 0.023, bicucu 4.28 ± 0.66, recovery 1.25 ± 0.13                                                                                                                                                                         | 3.830<br>0.092<br>-6.100            | 0.0044<br>0.9300<br>0.0017           | 6 cells/4 WT mice                                                                                                               |    |       |
| S11       | (e) gain control 0.206 ± 0.0047, bicucu 4.33 ± 0.76, plus APV 1.33 ± 0.2<br>control to bicu<br>recovery to bicucu<br>(f) threshold control 4.60 ± 0.063, bicucu 2.08 ± 0.27, plus APV 2.08 ± 0.23<br>control to bicu<br>recovery to bicucu                                                                                                                                                             | -5.520<br>-2.880<br>3.568<br>0.000  | 0.0027<br>0.0340<br>0.0160<br>1.0000 | 6 cells/4 WT mice/treatment                                                                                                     |    |       |

|               |                                                                                                                                                                                                                                                                                                                                                                                                                                                                                                                                                                             |                                                          |                                                          |                                                                                                                 |                                  |                                                    |
|---------------|-----------------------------------------------------------------------------------------------------------------------------------------------------------------------------------------------------------------------------------------------------------------------------------------------------------------------------------------------------------------------------------------------------------------------------------------------------------------------------------------------------------------------------------------------------------------------------|----------------------------------------------------------|----------------------------------------------------------|-----------------------------------------------------------------------------------------------------------------|----------------------------------|----------------------------------------------------|
|               | Sociability: WT: 0.369 ± 0.043, PKO 0.365 ± 0.062<br>Novety: WT:0.199 ± 0.086, 0.159 ± 0.097                                                                                                                                                                                                                                                                                                                                                                                                                                                                                | -0.06344<br>0.3672                                       | 0.949774<br>0.71568                                      | 19 WT, 18 PKO<br>19 WT, 18 PKO                                                                                  | 35<br>35                         | ttest<br>ttest                                     |
|               | Grroming: WT=53.446 ± 4.012 PKO=51.413 ± 3.914<br>Digging: WT=22.1 ± 1.714, PKO=21.055 ± 1.771                                                                                                                                                                                                                                                                                                                                                                                                                                                                              | 0.358<br>0.423                                           | 0.7220<br>6743                                           | 24 WT, 29 PKO<br>24 WT, 29 PKO                                                                                  | 51<br>51                         | ttest<br>ttest                                     |
| S13           | OF (Entries): 35.00 ± 10.52; 53.33 ± 14.04<br>OF (Time): 54.81 ± 20.90; 79.19 ± 19.14<br>OF (Distance): 4392 ± 476; 4207 ± 450<br>EPM (Entries): 16.2 ± 1.91; 18.3 ± 24.9<br>EPM (Time): 37.08 ± 6.77; 48.03 ± 5.05<br>EPM (Distance): 3080 ± 277; 2920 ± 333<br>Olfactor function (see below)                                                                                                                                                                                                                                                                              | -1.02309<br>-0.860<br>0.281<br>-0.848<br>-1.272<br>0.369 | 0.3225<br>0.4020<br>0.7814<br>0.4070<br>0.2200<br>0.7164 | 8 WT, 9 DKO<br>9 WT, 9 DKO<br>10 WT, 10 DKO<br>10 WT, 10 DKO<br>10 WT, 9 DKO<br>10 WT, 10 DKO<br>28 WT, 8 DKO   | 15<br>16<br>18<br>18<br>17<br>18 | ttest<br>ttest<br>ttest<br>ttest<br>ttest<br>ttest |
| S13           | OF (Entries): 42.4 ± 8.52; 58.46 ± 9.07<br>OF (Time): 65.99 ± 10.42; 95.63 ± 15.46<br>OF (Distance): 4000 ± 226; 4787 ± 354<br>EPM (Entries): 16.8 ± 3.58; 18.23 ± 1.99<br>EPM (Time): 29.36 ± 7.06; 38.55 ± 6.41<br>EPM (Distance): 3114 ± 246; 3038 ± 225<br>Olfactor function (see below)                                                                                                                                                                                                                                                                                | -1.257<br>-1.439<br>-1.683<br>-0.370<br>-0.947<br>0.226  | 0.2220<br>0.1654<br>0.1078<br>0.7150<br>0.3550<br>0.8230 | 10 WT, 13 PKO<br>9 WT, 13 PKO<br>9 WT, 13 PKO<br>10 WT, 13 PKO<br>9 WT, 13 PKO<br>10 WT, 14 PKO<br>28 WT, 8 PKO | 21<br>20<br>20<br>21<br>20<br>22 | ttest<br>ttest<br>ttest<br>ttest<br>ttest<br>ttest |
| S1 & 13       | Olfactory functions: genotypes* odors F (42, 728) = 0.4083, P = 0.9997; odor tirals: F (14, 728) = 15.24, P < 0.0001; genotypes: F (3, 52) = 0.2097, P = 0.8892                                                                                                                                                                                                                                                                                                                                                                                                             |                                                          |                                                          | 28 WT, 12 LKO, 8 DKO, 8 PKO                                                                                     |                                  |                                                    |
| S14           | b) RMP -65.0 ± 1.3 (WT) to -64.5 ± 1.1 mV, t = -0.28, p = 0.78<br>c) threshold (50% of maximum) 112.3 ± 2.4 (WT) to 112.4 ± 4.9<br>maximum spike # 84 ± 2.1 (WT) to 81.7 ± 3.8 (PTP1B KO)<br>Slope 20.6 ± 2.0 (WT) to 28.9 ± 3.8 (PTP1B KO)<br>e) decay tau 0.0411 ± 0.0028 (WT) to 0.0475 ± 0.0101 (PTP1B KO)<br>f) constant 4.56 ± 0.37 (WT) to 5.27 ± 0.66 (PTP1B KO)<br>g) Rest membrane conductance (nS)<br>5.14 ± 0.23 (WT) to 4.98 ± 0.30 (PTP1B KO), t = 0.46, p = 0.65<br>i) ANOVA Genotypes F(1,195) = 1.60, p = 0.207; Genotypes*Voltages F(4,195) = 0.24, 0.915 | 0.022<br>-0.53<br>1.91<br>-0.61<br>0.94<br>0.46          | 0.49<br>0.3<br>0.028<br>0.37<br>0.17<br>0.65             | 9-11 cells/5 WT, 22 -32 cells/ 8 PTP1B KO mice                                                                  |                                  |                                                    |
| S15           | (a) AP width (ANOVA genotypes*AP# F (18, 340) = 0.069, p = 1.0; genotypes F(2, 340) = 55.5, p < 0.0001; post-hoc DKO to WT p = 0.15, DKO to KO p < 0.0001),<br>(b) decay slope (ANOVA genotypes*AP# F (18, 340) = 0.018, p = 1.0; genotypes F(2, 340) = 29.4, p < 0.0001; post-hoc DKO to WT p = 0.94, DKO to KO p < 0.0001),<br>(c) fast afterhyperpolarization (fAHP)(ANOVA genotypes*AP# F (18, 340) = 0.01, p = 1.0; genotypes F(2, 340) = 46.3, p < 0.0001; post-hoc DKO to WT p = 1, DKO to KO p < 0.0001).                                                           |                                                          |                                                          | 11 cells/5 WT, 10 cells/5 KO, 16 cells/7 DKO mice.                                                              |                                  |                                                    |
| S16           |                                                                                                                                                                                                                                                                                                                                                                                                                                                                                                                                                                             |                                                          |                                                          |                                                                                                                 |                                  |                                                    |
| S16 a         |                                                                                                                                                                                                                                                                                                                                                                                                                                                                                                                                                                             |                                                          |                                                          |                                                                                                                 |                                  |                                                    |
| PPR           | genotypes F (2,319) = 44.4, p < 0.0001<br>Genotypes*Frequency F(6,319) = 2.07, p = 0.018<br>post-hoc WT to DKO p = 1; DKO to KO p < 0.0001.                                                                                                                                                                                                                                                                                                                                                                                                                                 |                                                          |                                                          | 19 cells/5 WT, 16cells/4 KO, 18 cells/5 DKO mice                                                                |                                  |                                                    |
| S16 b         |                                                                                                                                                                                                                                                                                                                                                                                                                                                                                                                                                                             |                                                          |                                                          |                                                                                                                 |                                  |                                                    |
| 5th/1st ratio | genotypes F (2,279) = 25.6, p < 0.0001<br>Genotypes*Frequency F(6,279) = 5.6, p < 0.0001<br>post-hoc WT to DKO p < 0.0001; DKO to KO p = 1.                                                                                                                                                                                                                                                                                                                                                                                                                                 |                                                          |                                                          | 11 cells/5 WT, 14cells/4 KO, 18 cells/5 DKO mice                                                                |                                  |                                                    |
| PPR           |                                                                                                                                                                                                                                                                                                                                                                                                                                                                                                                                                                             |                                                          |                                                          |                                                                                                                 |                                  |                                                    |
| S16 c         | Genotypes F(2,165) = 20.87, p = 8.33 x 10 <sup>-9</sup><br>Genotypes* duration F(4,165) = 2.26, p = 0.065<br>post-hocwt to DKO p = 7.22 x 10 <sup>-7</sup> , DKO to KO p = 1.                                                                                                                                                                                                                                                                                                                                                                                               |                                                          |                                                          | 21 cells/7 WT, 21cells/8 KO, 19 cell/8 DKO mice                                                                 |                                  |                                                    |
| 5th/1st ratio | Genotypes F(2,127) = 5.97, p = 0.00332                                                                                                                                                                                                                                                                                                                                                                                                                                                                                                                                      |                                                          |                                                          |                                                                                                                 |                                  |                                                    |
| S16 d         | Genotypes* frequency F(4,127) = 1.00, p = 0.407                                                                                                                                                                                                                                                                                                                                                                                                                                                                                                                             |                                                          |                                                          | 6 cells/3 WT, 21 cells/8 KO, 19 cell/8 DKO mice                                                                 |                                  |                                                    |

**Supplementary References:**

1. Hippenmeyer, S., *et al.* A developmental switch in the response of DRG neurons to ETS transcription factor signaling. *PLoS Biol* **3**, e159 (2005).
2. Hahm, K., *et al.* Defective neural tube closure and anteroposterior patterning in mice lacking the LIM protein LMO4 or its interacting partner Deaf-1. *Mol Cell Biol* **24**, 2074-2082 (2004).
3. Bence, K.K., *et al.* Neuronal PTP1B regulates body weight, adiposity and leptin action. *Nat Med* **12**, 917-924 (2006).
4. Yang, M. & Crawley, J.N. Simple behavioral assessment of mouse olfaction. *Curr Protoc Neurosci* **Chapter 8**, Unit 8 24 (2009).
5. Zaman, T., *et al.* LMO4 Is Essential for Paraventricular Hypothalamic Neuronal Activity and Calcium Channel Expression to Prevent Hyperphagia. *J Neurosci* **34**, 140-148 (2014).
6. Qin, Z., *et al.* Chronic Stress Induces Anxiety via an Amygdalar Intracellular Cascade that Impairs Endocannabinoid Signaling. *Neuron* **85**, 1319-1331 (2015).
7. Kuroda, M., Yokofujita, J. & Murakami, K. An ultrastructural study of the neural circuit between the prefrontal cortex and the mediodorsal nucleus of the thalamus. *Prog Neurobiol* **54**, 417-458 (1998).
8. Collins, D.P., Anastasiades, P.G., Marlin, J.J. & Carter, A.G. Reciprocal Circuits Linking the Prefrontal Cortex with Dorsal and Ventral Thalamic Nuclei. *Neuron* **98**, 366-379 e364 (2018).
9. Pouille, F., *et al.* Input normalization by global feedforward inhibition expands cortical dynamic range. *Nat Neurosci* **12**, 1577-1585 (2009).
10. Kanter, E.D., Kapur, A. & Haberly, L.B. A dendritic GABAA-mediated IPSP regulates facilitation of NMDA-mediated responses to burst stimulation of afferent fibers in piriform cortex. *J Neurosci* **16**, 307-312 (1996).
11. Royer, S., *et al.* Control of timing, rate and bursts of hippocampal place cells by dendritic and somatic inhibition. *Nat Neurosci* **15**, 769-775 (2012).
